# Supplementary material
Source: PubMed Central journal article supplement (PMC1681536)
Supplement: hesr041-0284-S1.pdf [file hesr041-0284-S1.pdf]

**Appendix: Pilot Core Items and Differences between the US and Dutch Versions**

| <b>Dutch Item</b> | <b>US Pilot Item</b> | <b>Revised H-CAHPS Item</b> | <b>Item Description</b>                          | <b>Response Scale*</b> |
|-------------------|----------------------|-----------------------------|--------------------------------------------------|------------------------|
| Q4                | Q'4                  | #1                          | Nurses respected                                 | N-S-U-A                |
| Q5                | Q'5                  | #2                          | Nurses listened carefully                        | N-S-U-A                |
| Q6                | Q'6                  | #3                          | Nurses explained things clearly                  | N-S-U-A                |
| Q7                | Q'7                  |                             | Nurses spent enough time                         | N-S-U-A                |
| Q9                | Q'9                  | #4                          | Help as soon as wanted                           | N-S-U-A                |
| Q11               | Q'11                 | #6                          | Doctor respected                                 | N-S-U-A                |
| Q12               | Q'12                 | #7                          | Doctor listened carefully                        | N-S-U-A                |
| Q13               | Q'13                 | #8                          | Doctor explained things clearly                  | N-S-U-A                |
| Q14               | Q'14                 |                             | Doctor spent enough time                         | N-S-U-A                |
| Q16               | Q'16                 |                             | Comfortable room temperature                     | N-S-U-A                |
| Q17               | Q'17                 | #10                         | Clean room and bathroom                          | N-S-U-A                |
| Q18               | Q'18                 | #11                         | Room surroundings quiet at night                 | N-S-U-A                |
| Q20               | Q'20                 |                             | Getting help with bathing                        | N-S-U-A                |
| Q22               | Q'22                 | #13                         | Getting help to bathroom or with bedpan          | N-S-U-A                |
| Q24               | Q'24                 |                             | Privacy                                          | N-S-U-A                |
| Q25               | Q'25                 |                             | Involved in own treatment decisions              | N-S-U-A                |
| Q27               | Q'27                 |                             | Staff helped family                              | N-S-U-A                |
| Q28               | Q'28                 |                             | Staff introduced self                            | N-S-U-A                |
| Q31               | Q'31                 |                             | Got pain medication quickly                      | N-S-U-A                |
| Q32               | Q'32                 | #15                         | Pain controlled                                  | N-S-U-A                |
| Q33               | Q'33                 | #16                         | Everything done to help with pain                | N-S-U-A                |
| Q35               | Q'35                 |                             | Medical tests done without pain                  | N-S-U-A                |
| Q37               | Q'37                 |                             | Told name of new medicine                        | N-S-U-A                |
| Q38               | Q'38                 |                             | Told what new medicine was for                   | N-S-U-A                |
| Q39               | Q'39                 |                             | Asked if taking other medicine                   | N-S-U-A                |
| Q40               | Q'40                 | #17                         | Asked if allergic to any medication              | N-S-U-A                |
| Q41               | Q'41                 | #19                         | Told side-effects of new medicine                | N-S-U-A                |
| Q43               | Q'43                 |                             | Delays in admission                              | Yes-No                 |
|                   | Q'44                 |                             | Living will                                      | Yes-No                 |
| Q46               | Q'47                 |                             | Given written information on possible activities | Yes-No                 |
| Q47               |                      |                             | Given verbal information on possible activities  | Yes-No                 |
| Q48               | Q'48                 | #21                         | Getting post-discharge help if needed            | Yes-No                 |
| Q49               | Q'49                 | #22                         | Written information on problems after discharge  | Yes-No                 |
| Q50               |                      |                             | Verbal information on problems after discharge   | Yes-No                 |
| Q52               | Q'51                 |                             | Written information on taking medicine at home   | Yes-No                 |
| Q53               |                      |                             | Verbal information on taking medicine at home    | Yes-No                 |

\* N-S-U-A: never, sometimes, usually, always
